# Supplementary material
Source: HighWire-hosted journal article supplement (https://qualitysafety.bmj.com/content/28/7/534)

Supplementary figure S1. Flow diagram of study cohort selection

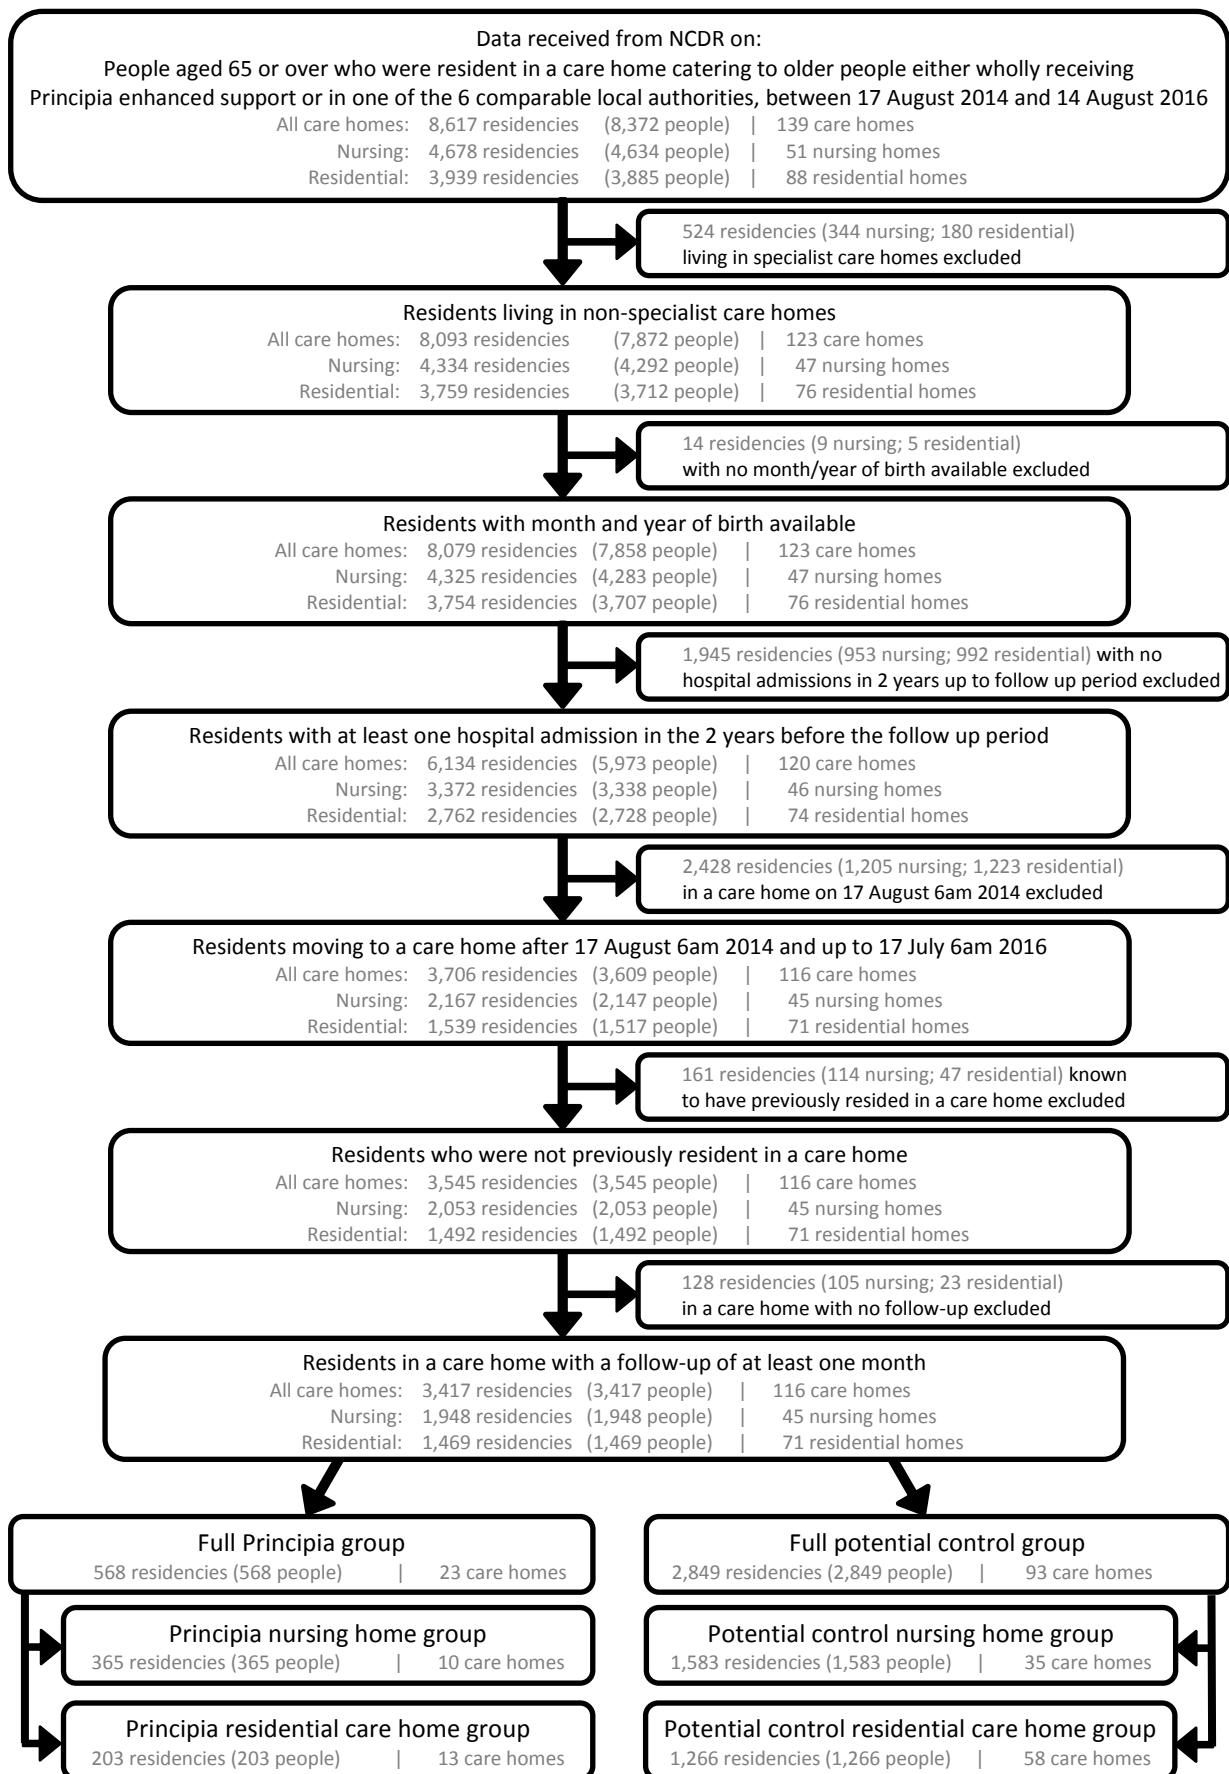

Supplement: inline-supplementary-material-1 [file inline-supplementary-material-1.pdf]
